# Supplementary material for: Incorporation of Sulfonamide Moiety into Biguanide Scaffold Results in Apoptosis Induction and Cell Cycle Arrest in MCF-7 Breast Cancer Cells
Source: MDPI journal article supplement (doi:10.3390/ijms22115642), 2021-05-26

## SUPPORTING INFORMATION

**Incorporation of sulfonamide moiety into biguanide scaffold results in apoptosis induction and cell cycle arrest in MCF-7 breast cancer cells.**

**Magdalena Markowicz-Piasecka<sup>1\*</sup>, Karol Sadowski<sup>2</sup>, Johanna Huttunen<sup>3</sup>, Joanna Sikora<sup>1</sup> and Kristiina M. Huttunen<sup>3</sup>**

<sup>1</sup> Laboratory of Bioanalysis, Department of Pharmaceutical Chemistry, Drug Analysis and Radiopharmacy, Medical University of Lodz, ul. Muszyńskiego1, 90-151 Lodz, Poland; e-mail: [magdalena.markowicz@umed.lodz.pl](mailto:magdalena.markowicz@umed.lodz.pl); joanna.sikora@umed.lodz.pl

<sup>2</sup> Students Research Group, Department of Pharmaceutical Chemistry, Drug Analysis and Radiopharmacy, Medical University of Lodz, ul. Muszyńskiego1, 90-151 Lodz, Poland; e-mail: karol.sadowski1@stud.umed.lodz.pl

<sup>3</sup> School of Pharmacy, Faculty of Health Sciences, University of Eastern Finland, Yliopistonranta 1C, POB 1627, 70211 Kuopio, Finland; e-mail: kristiina.huttunen@uef.fi

**Table S1.** Eadie-Hofstee analysis of the uptake of sulfonamide derivatives of metformin (**1 – 10**) in MCF-7 and MDA-MB-231 cells ( $K_m$  and  $V_{max}$  values).

|           |               | Kinetic parameters of prodrugs uptake |                         |                             |                         |
|-----------|---------------|---------------------------------------|-------------------------|-----------------------------|-------------------------|
|           |               | MCF-7                                 |                         | MDA-231 cells               |                         |
| Compound  | Transp.       | $K_m$ [ $\mu\text{mol/L}$ ]           | $V_{max}$ [nmol/min/mg] | $K_m$ [ $\mu\text{mol/L}$ ] | $V_{max}$ [nmol/min/mg] |
| <b>1</b>  | I             | $890.4 \pm 216.1$                     | $0.653 \pm 0.124$       | $22.66 \pm 3.0$             | $0.476 \pm 0.023$       |
|           | $V_{max}/K_m$ | 0.000733                              |                         | 0.02101                     |                         |
|           | II            | $1054 \pm 556.2$                      | $1.225 \pm 0.358$       | $298.4 \pm 134.0$           | $0.714 \pm 0.184$       |
|           | $V_{max}/K_m$ | 0.001162                              |                         | 0.002393                    |                         |
| <b>2</b>  | I             | $257.9 \pm 43.28$                     | $1.147 \pm 0.084$       | $2115 \pm 470.7$            | $0.958 \pm 0.149$       |
|           | $V_{max}/K_m$ | 0.004447                              |                         | 0.000453                    |                         |
|           | II            | $1907 \pm 490.0$                      | $4.640 \pm 0.689$       | $590.6 \pm 164.1$           | $0.707 \pm 0.079$       |
|           | $V_{max}/K_m$ | 0.002433                              |                         | 0.001197                    |                         |
| <b>3</b>  | I             | $532.7 \pm 90.2$                      | $1.621 \pm 0.151$       | NE                          | NE                      |
|           | $V_{max}/K_m$ | 0.003043                              |                         | NE                          |                         |
|           | II            | $367.4 \pm 75.1$                      | $1.856 \pm 0.136$       | NE                          | NE                      |
|           | $V_{max}/K_m$ | 0.005052                              |                         | NE                          |                         |
| <b>4</b>  | I             | $1518 \pm 180.4$                      | $1.201 \pm 0.121$       | $144.6 \pm 32.81$           | $0.249 \pm 0.022$       |
|           | $V_{max}/K_m$ | 0.000791                              |                         | 0.001722                    |                         |
|           | II            | $3389 \pm 605.9$                      | $2.850 \pm 0.438$       | $2930 \pm 652.4$            | $1.504 \pm 0.278$       |
|           | $V_{max}/K_m$ | 0.000841                              |                         | 0.000513                    |                         |
| <b>5</b>  | I             | $413.5 \pm 167.2$                     | $0.491 \pm 0.182$       | $31.18 \pm 9.06$            | $0.274 \pm 0.023$       |
|           | $V_{max}/K_m$ | 0.001187                              |                         | 0.008788                    |                         |
|           | II            | $760.3 \pm 86.20$                     | $1.160 \pm 0.080$       | $693.8 \pm 311.8$           | $1.021 \pm 0.211$       |
|           | $V_{max}/K_m$ | 0.001526                              |                         | 0.001472                    |                         |
| <b>6</b>  | I             | $1260 \pm 178.3$                      | $2.713 \pm 0.235$       | NE                          | NE                      |
|           | $V_{max}/K_m$ | 0.002153                              |                         | NE                          |                         |
|           | II            | $1077 \pm 145.1$                      | $2.705 \pm 0.234$       | NE                          | NE                      |
|           | $V_{max}/K_m$ | 0.002512                              |                         | NE                          |                         |
| <b>7</b>  | I             | $588.5 \pm 79.7$                      | $2.223 \pm 0.154$       | $2689 \pm 1945$             | $0.569 \pm 0.290$       |
|           | $V_{max}/K_m$ | 0.003777                              |                         | 0.000212                    |                         |
|           | II            | $962.7 \pm 60.78$                     | $3.980 \pm 0.140$       | $349.5 \pm 70.54$           | $0.313 \pm 0.029$       |
|           | $V_{max}/K_m$ | 0.004134                              |                         | 0.000895                    |                         |
| <b>8</b>  | I             | $358.1 \pm 256.7$                     | $0.629 \pm 0.223$       | $1755 \pm 418.1$            | $38.20 \pm 6.451$       |
|           | $V_{max}/K_m$ | 0.001756                              |                         | 0.021766                    |                         |
|           | II            | $896.7 \pm 213.3$                     | $2.802 \pm 0.276$       | $546.5 \pm 358.3$           | $27.91 \pm 6.767$       |
|           | $V_{max}/K_m$ | 0.003124                              |                         | 0.051070                    |                         |
| <b>9</b>  | I             | $259.7 \pm 63.31$                     | $0.793 \pm 0.099$       | $630.5 \pm 466.6$           | $0.885 \pm 0.412$       |
|           | $V_{max}/K_m$ | 0.003053                              |                         | 0.001404                    |                         |
|           | II            | $465.8 \pm 188.3$                     | $1.296 \pm 0.169$       | $137.2 \pm 240.2$           | $1.028 \pm 0.463$       |
|           | $V_{max}/K_m$ | 0.002782                              |                         | 0.007493                    |                         |
| <b>10</b> | I             | NE                                    | NE                      | NE                          | NE                      |

|  |                |    |    |    |    |
|--|----------------|----|----|----|----|
|  | $V_{\max}/K_m$ | NE |    | NE |    |
|  | II             | NE | NE | NE | NE |
|  | $V_{\max}/K_m$ | NE |    | NE |    |

NE- not established.

**Figure S1.** The uptake of compounds 3 - 10 into MCF-7 cells at the concentrations of 10 – 2000  $\mu\text{mol/L}$  and Eadie–Hofstee plots for OCTs mediated transport.

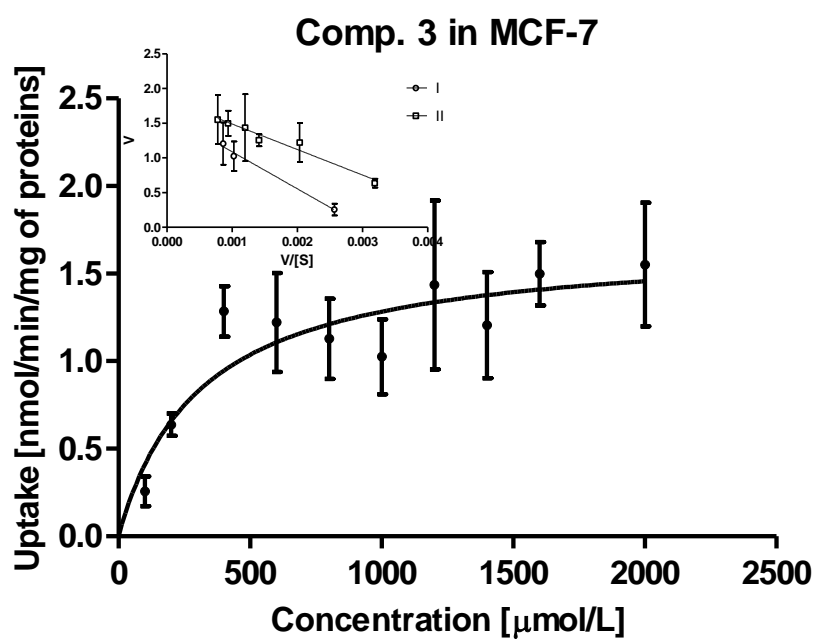

Comp. 4 in MCF-7

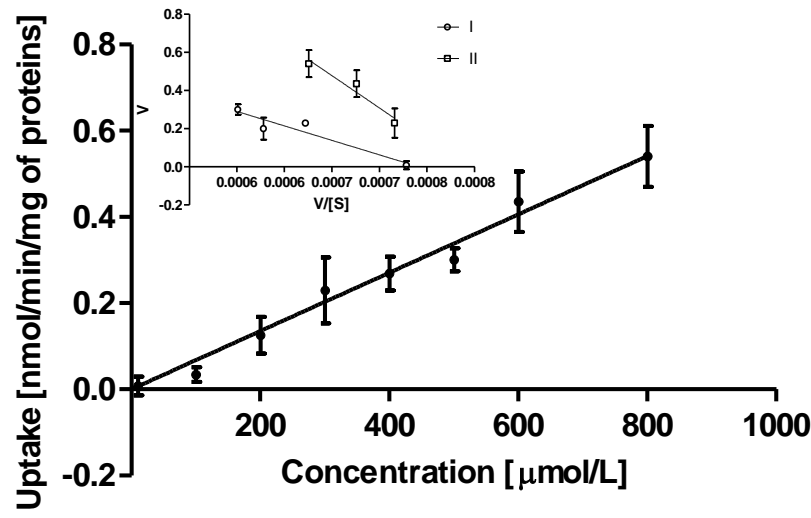

Comp. 5 in MCF-7 cells

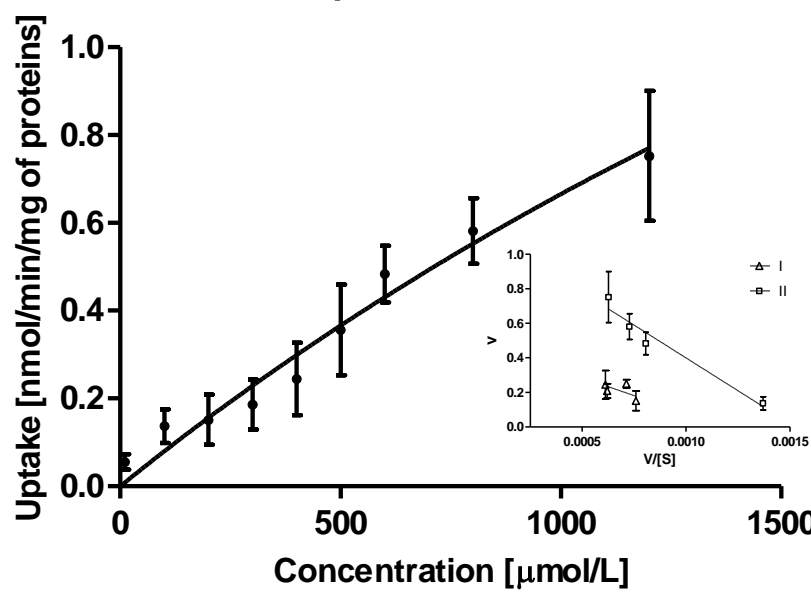

Comp. 6 in MCF-7

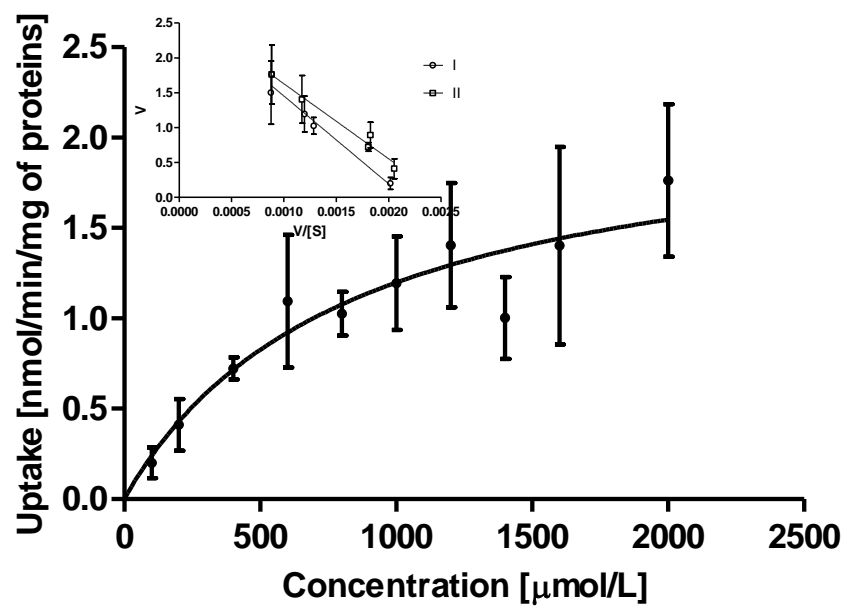

Comp. 7 in MCF-7

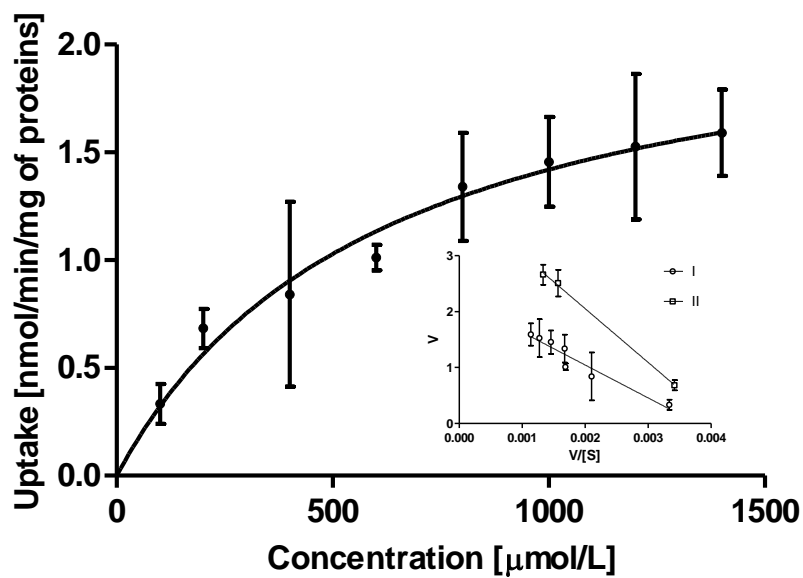

### Comp. 8 in MCF-7

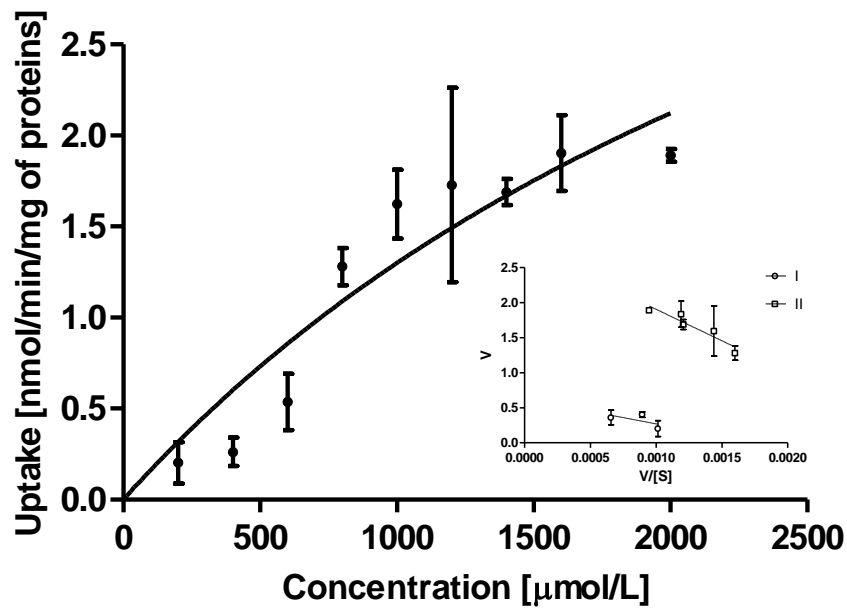

### Comp. 9 in MCF-7

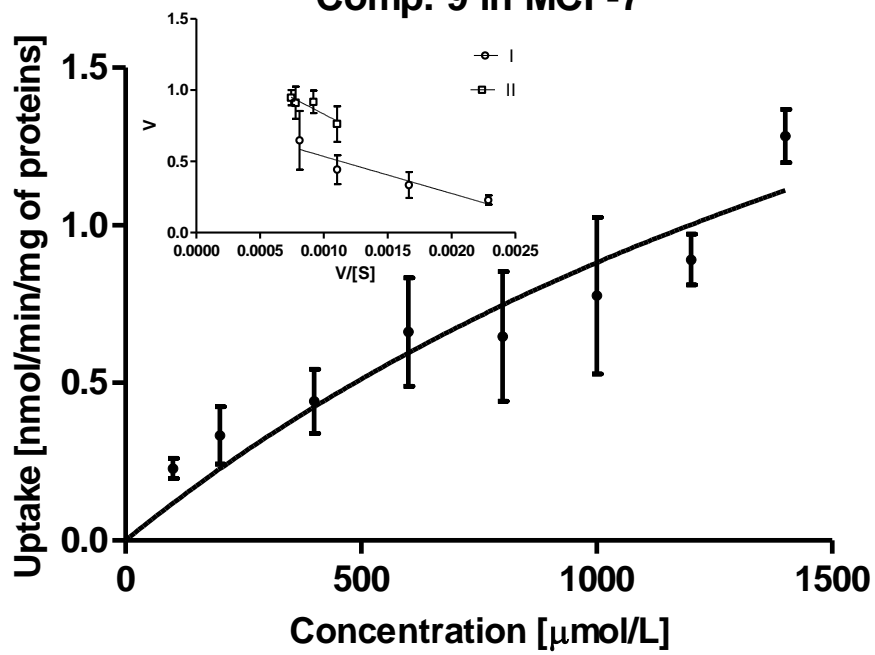

### Comp. 10 in MCF-7

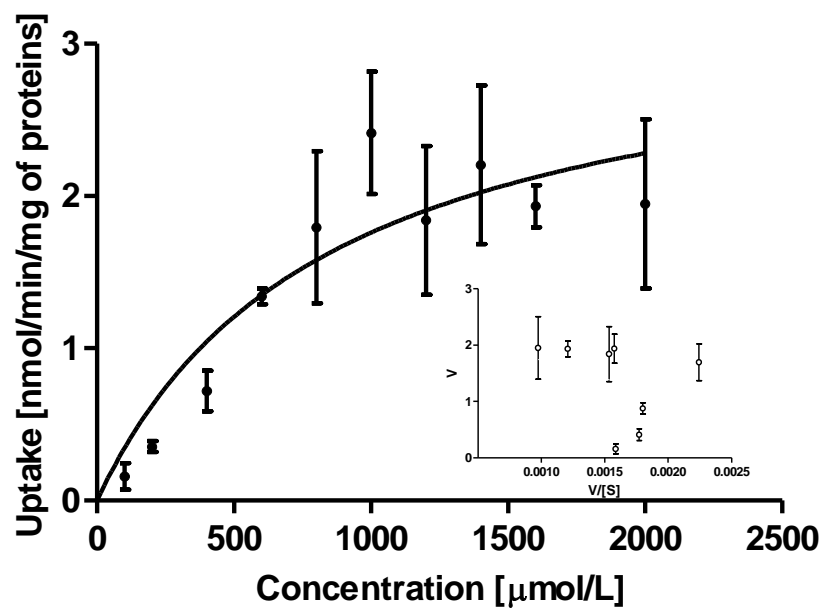

**Figure S2.** The uptake mechanism of compounds 3 – 10 (400 and 800  $\mu\text{mol/L}$ ) into MCF-7 cells and MDA-MB-231 cells. The uptake was determined in the presence of OCT and MATE inhibitors, disopyramide, lopinavir, methenamine, cimetidine (400 and 800  $\mu\text{mol/L}$ ) for 10 minutes at 37 °C. The significant differences between pure compounds 3 – 10 and their mixtures with inhibitors are denoted with asterisk. \*  $p < 0.05$ , \*\*  $p < 0.01$ , \*\*\*  $p < 0.001$ .

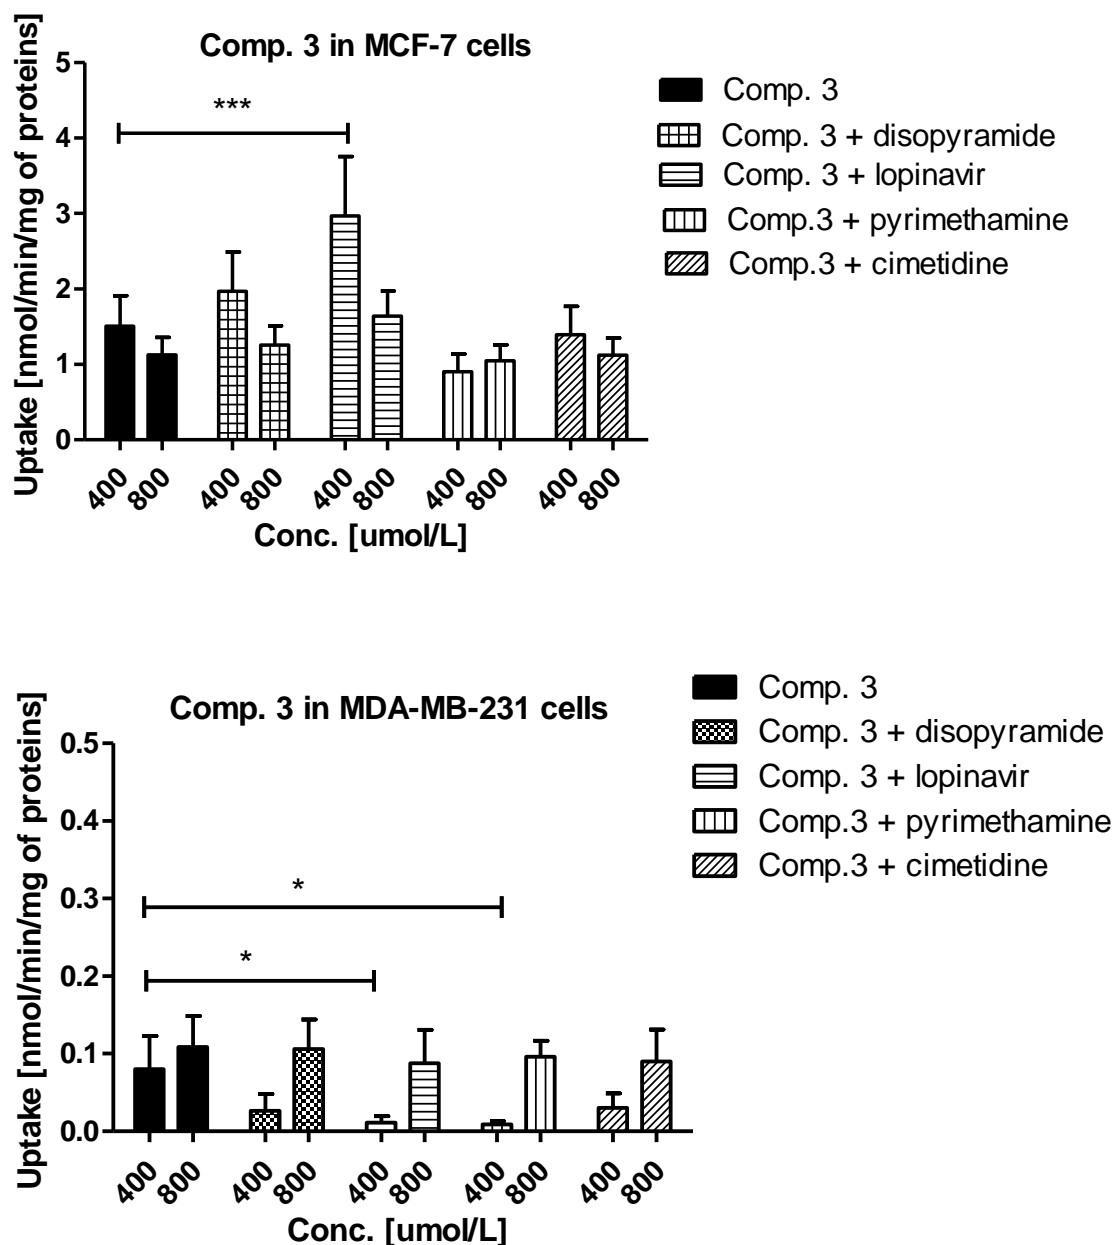

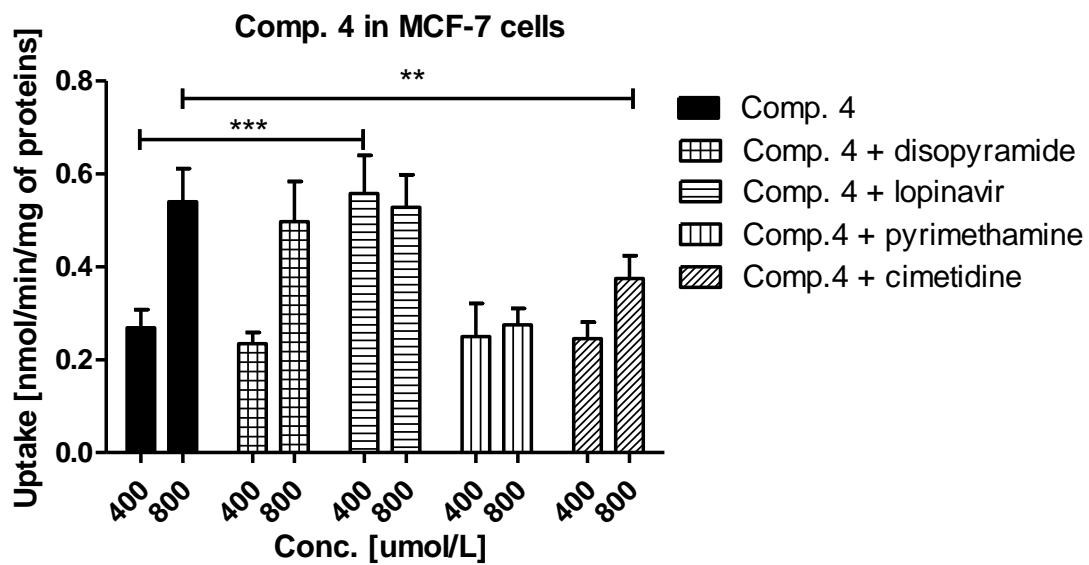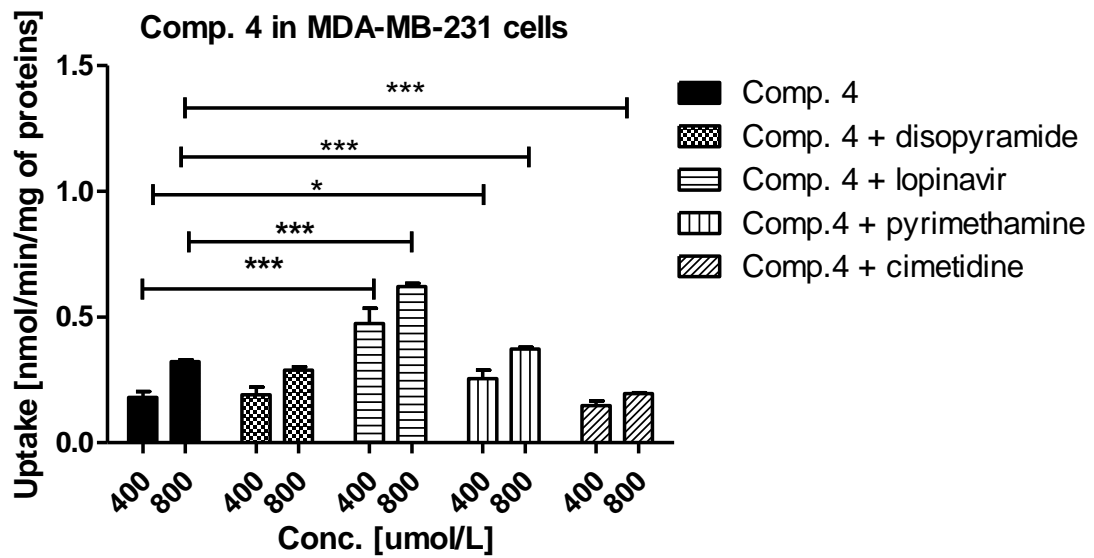

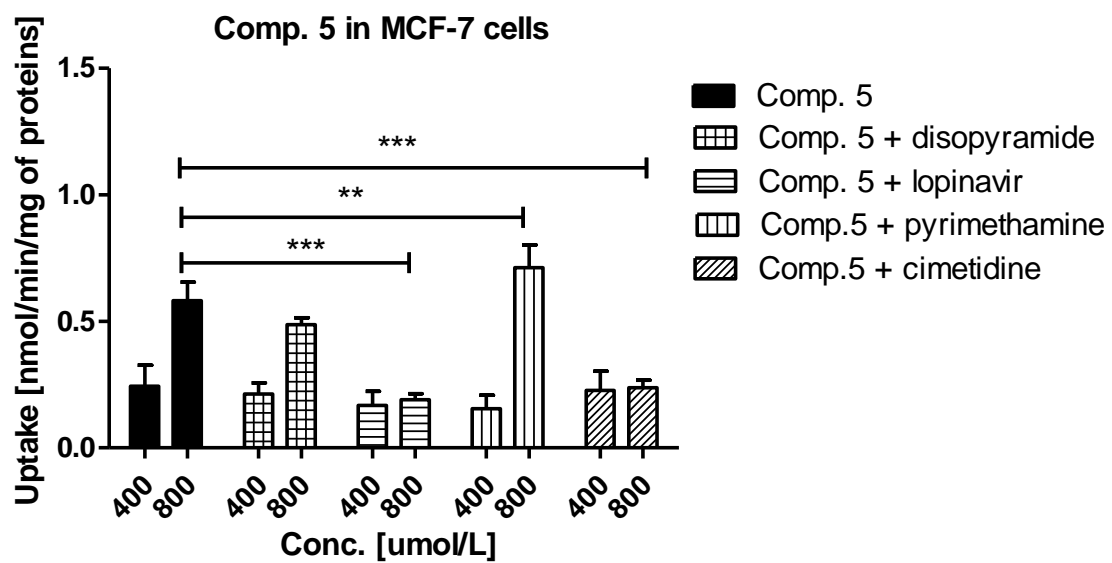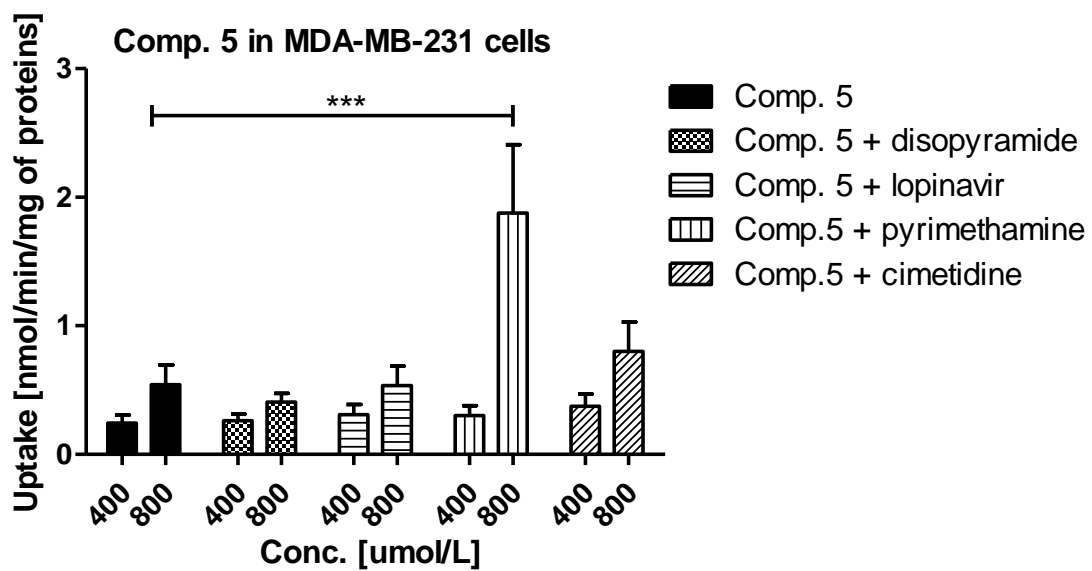

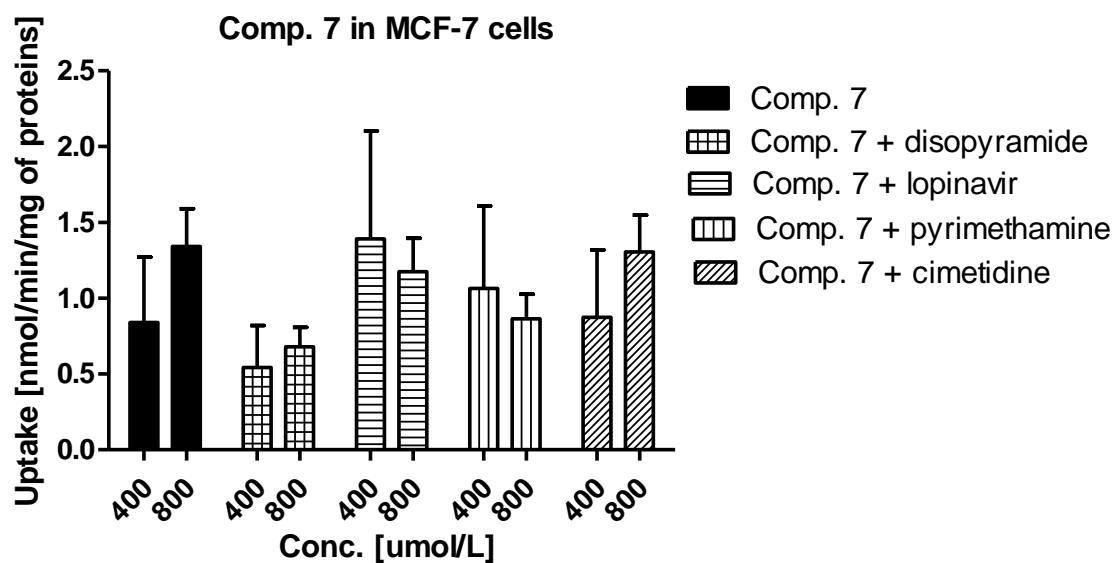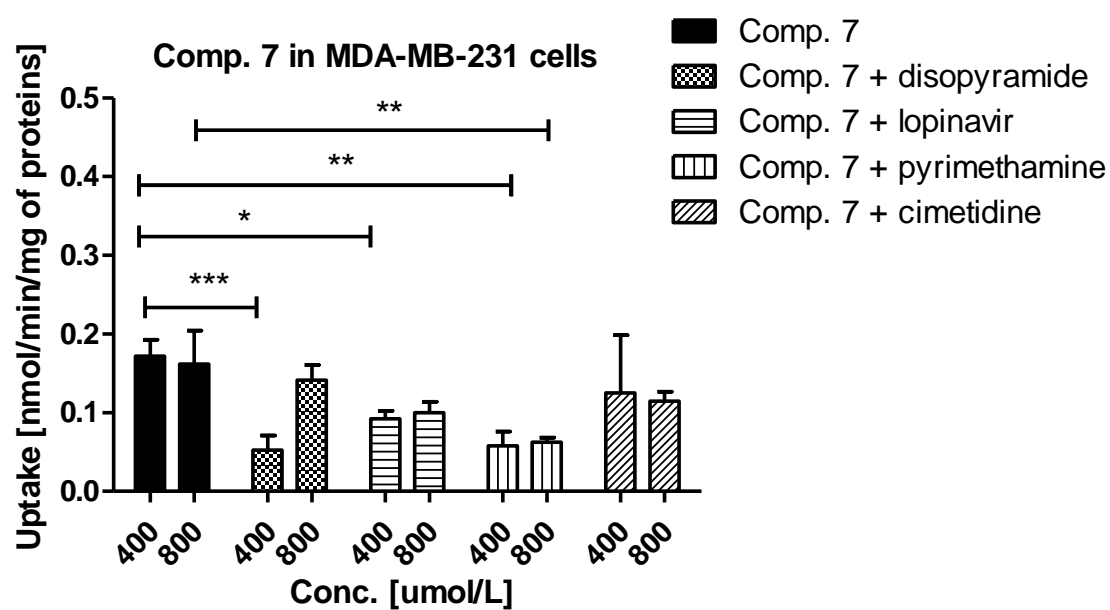

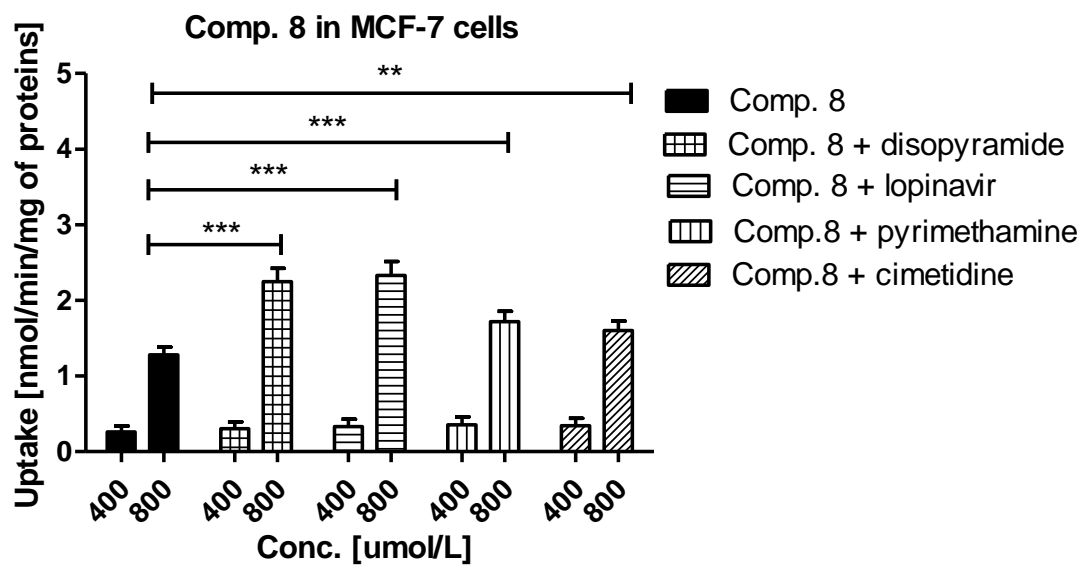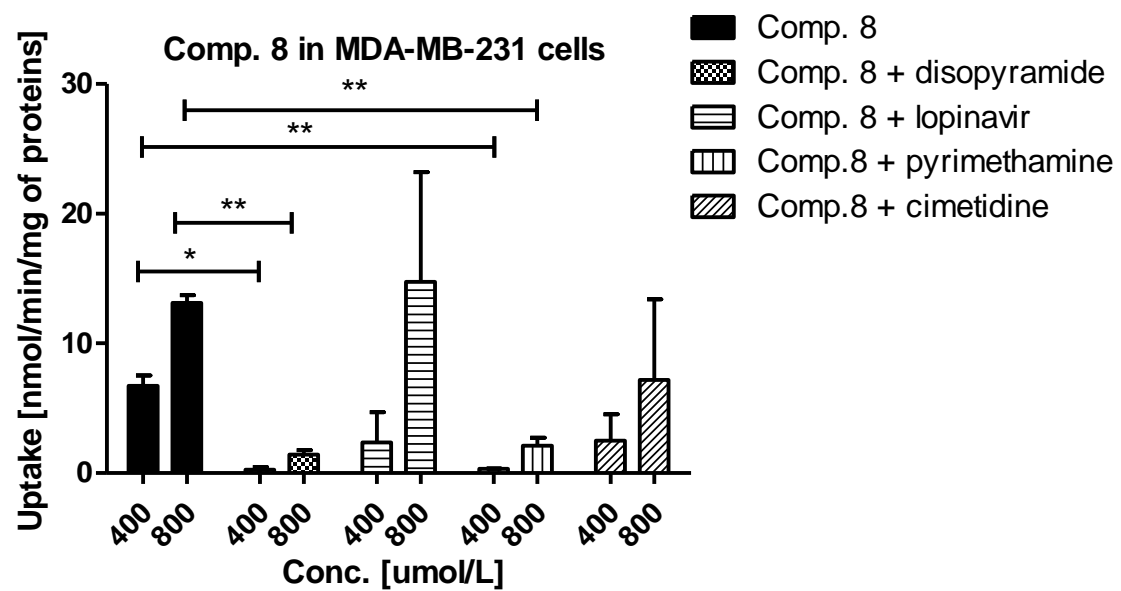

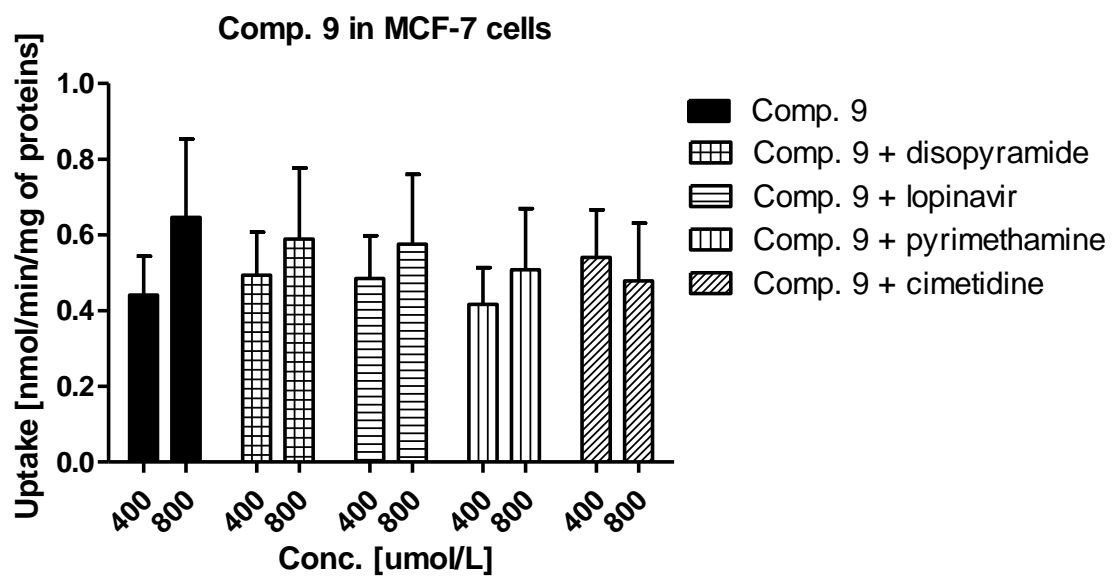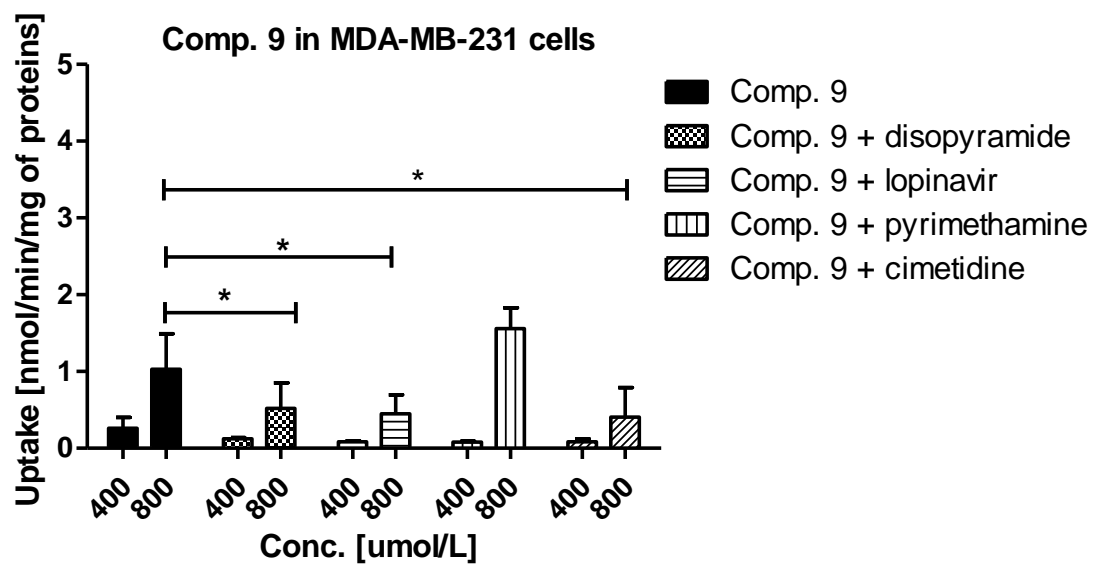

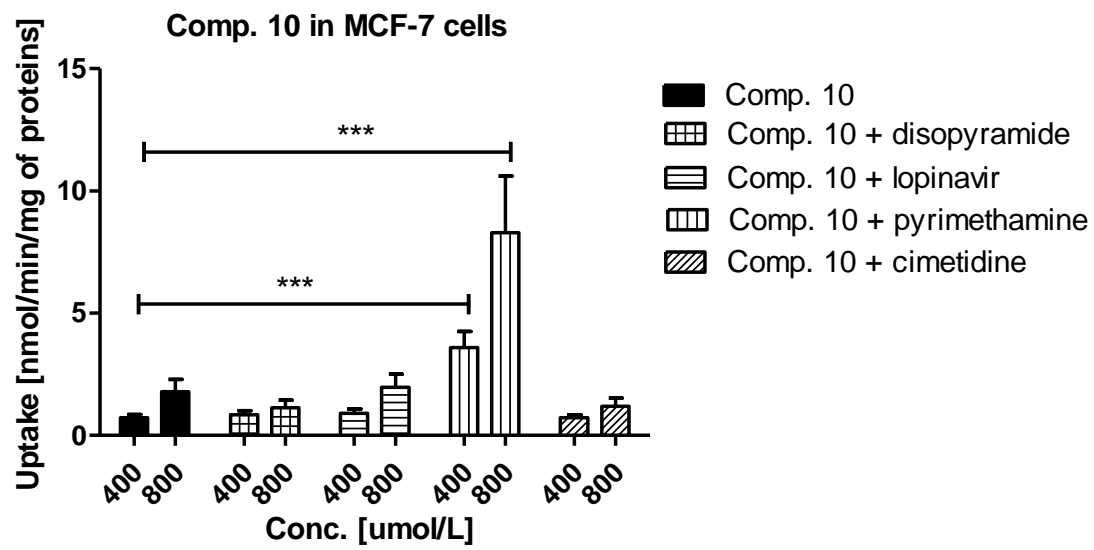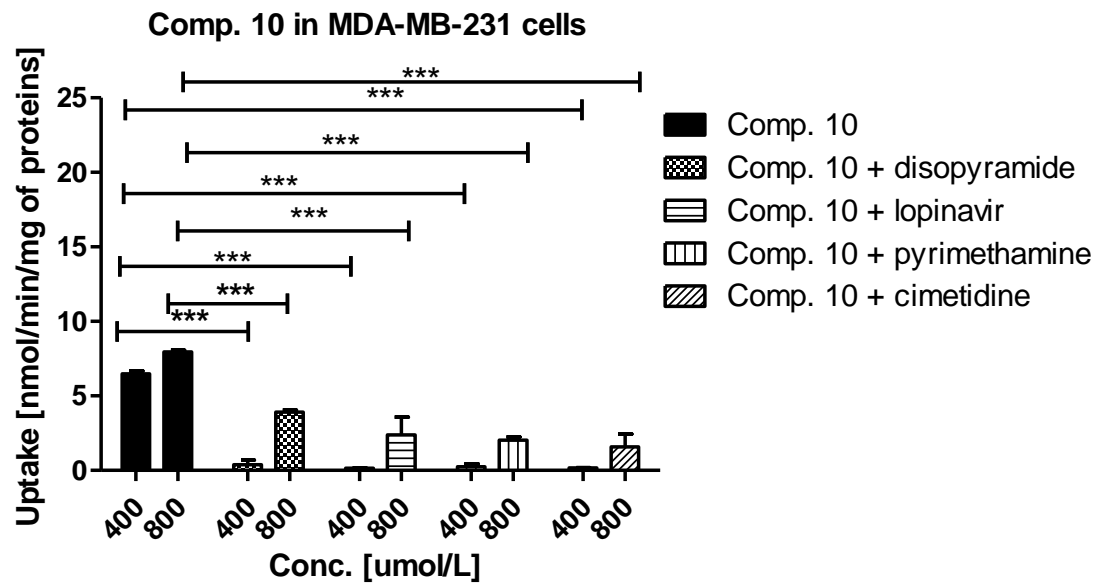

**Figure S3.** The uptake of compounds **3** - **10** into MDA-MB-231 cells at the concentrations of 10 – 2000  $\mu\text{mol/L}$  and Eadie-Hofstee plots for OCTs mediated transport.

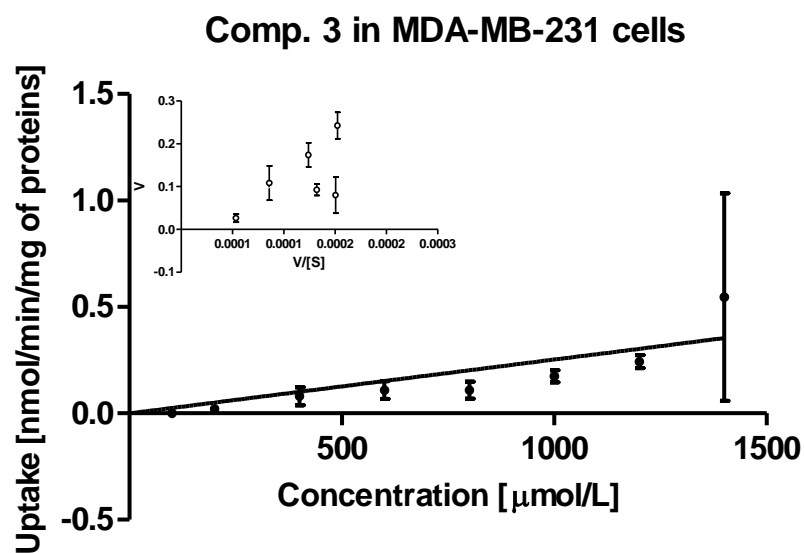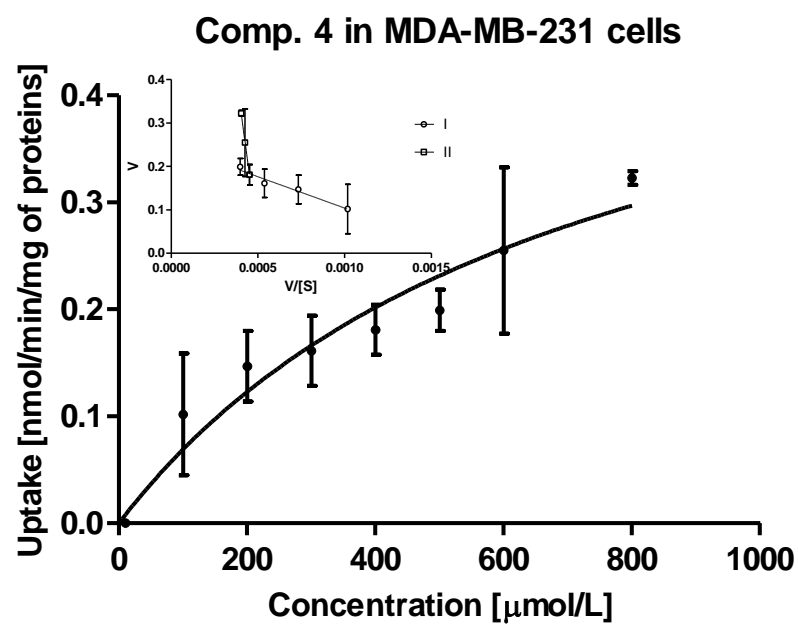

### Comp. 5 in MDA-MB-231 cells

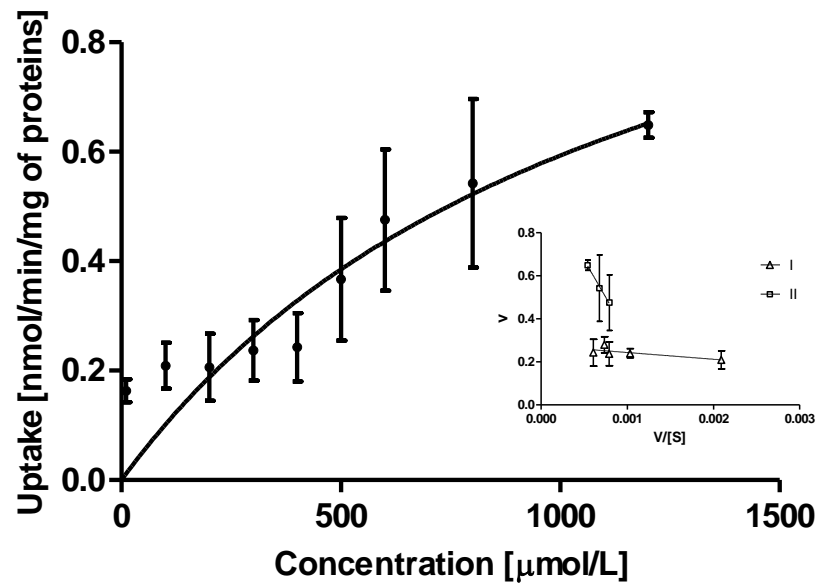

### Comp. 6 in MDA-MB-231 cells

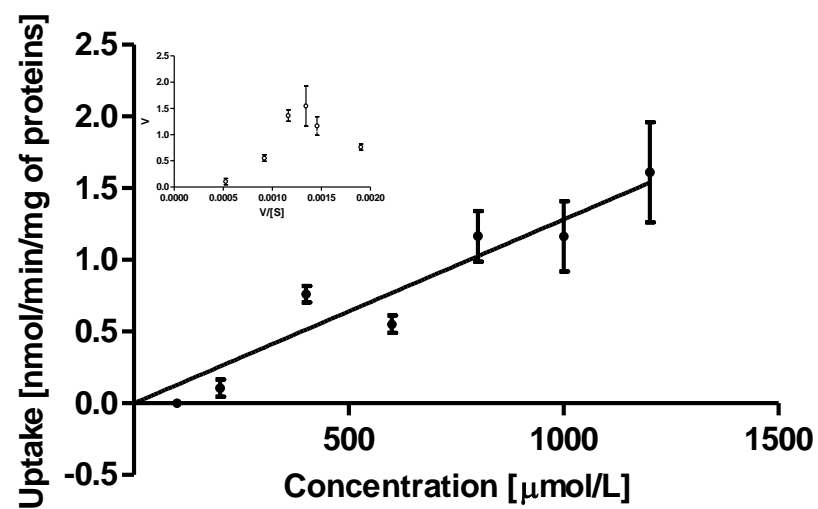

### Comp. 7 in MDA-MB-231 cells

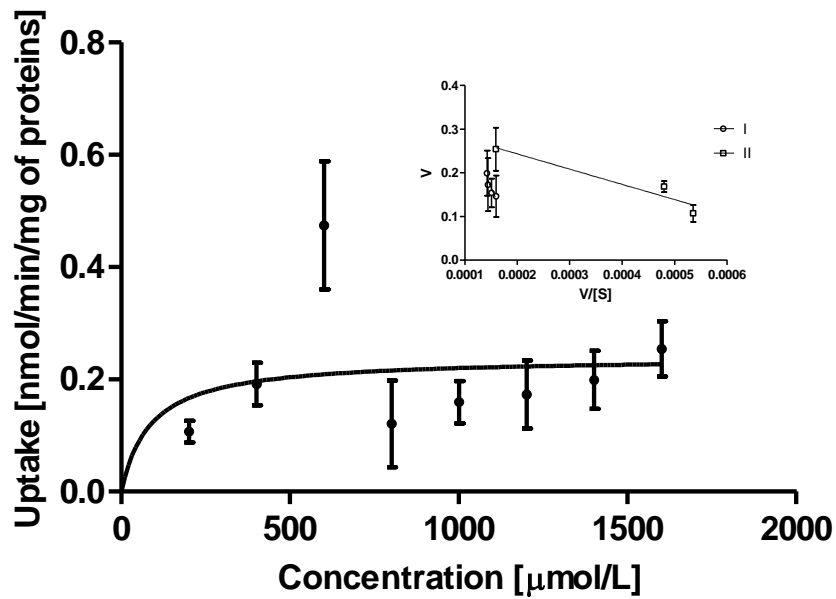

### Comp. 8 in MDA-MB-231 cells

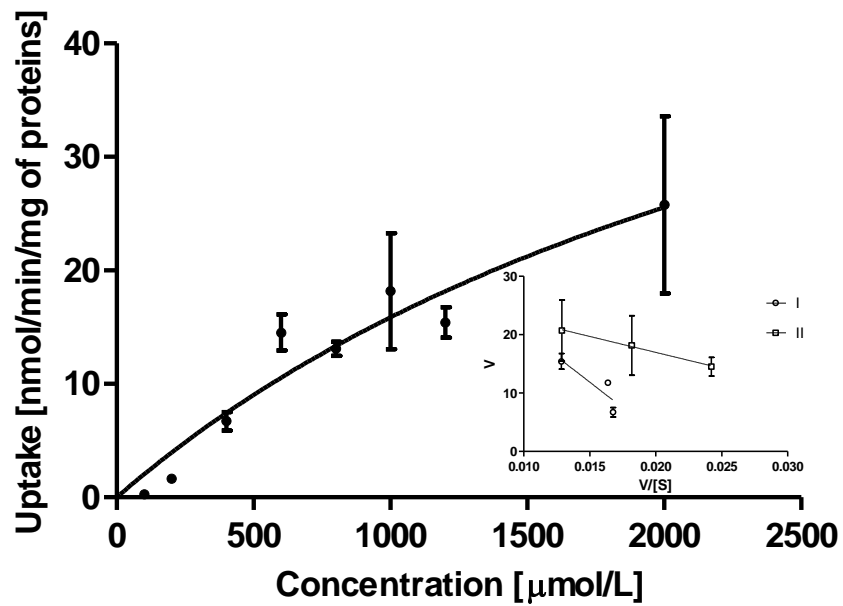

### Comp. 9 in MDA-MB-231 cells

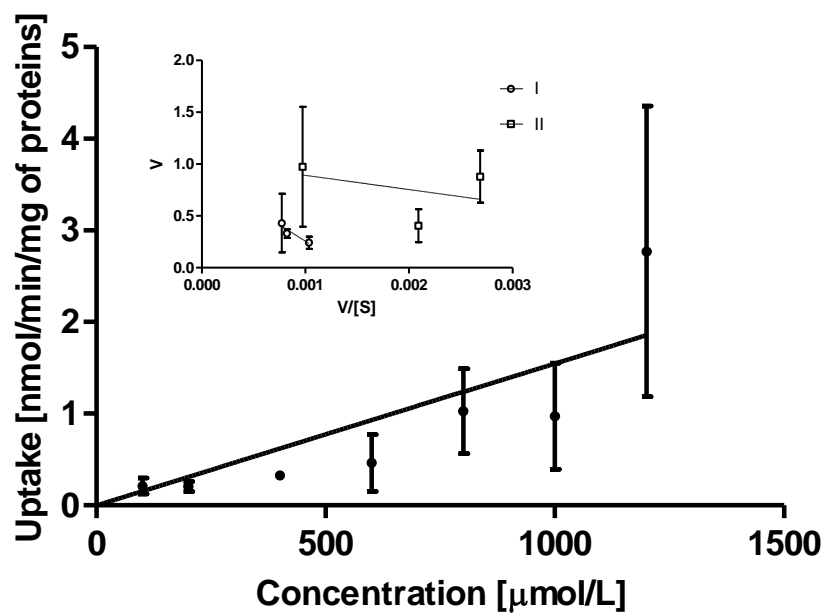

### Comp. 10 in MDA-MB-231 cells

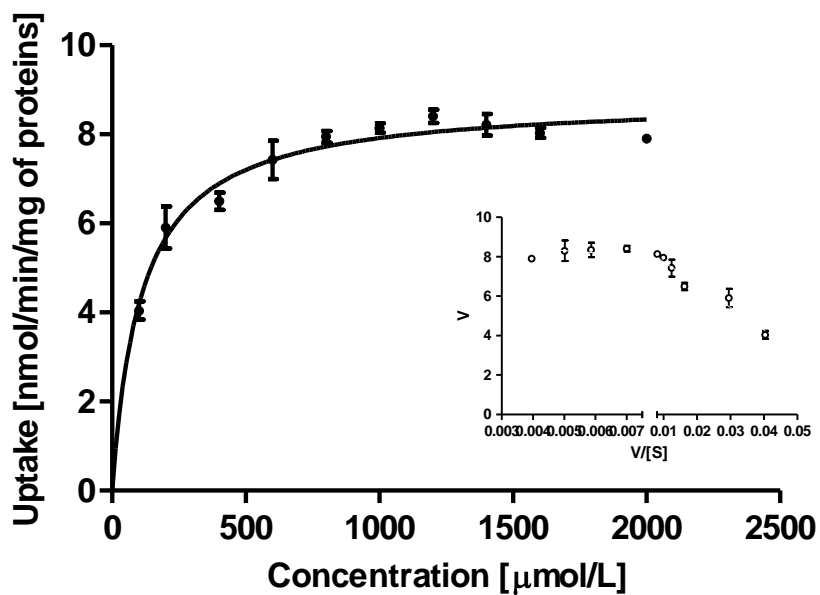

**Table S2.** The summary of interactions of metformin derivatives 1 – 10 with OCT, PMAT and MATE1 transporters in MCF-7 and MDA-MB-231 cells.

| COMPOUND | MCF-7                   | MDA-MB-231              |
|----------|-------------------------|-------------------------|
| 1        | OCT3 (non-sign.)        | OCT3, PMAT              |
| 2        | PMAT, MATE1             | OCT1, PMAT              |
| 3        | PMAT                    | PMAT, MATE1             |
| 4        | OCT3, PMAT              | OCT3, PMAT, MATE1       |
| 5        | OCT3, PMAT, MATE1       | MATE1                   |
| 6        | OCT1, OCT3, PMAT, MATE1 | OCT1, MATE1             |
| 7        | OCT1 (non-sign.)        | OCT1, PMAT, MATE1       |
| 8        | OCT1, OCT3, PMAT, MATE1 | OCT1, MATE1             |
| 9        | OCT3 (non-sign.)        | OCT1, OCT3, PMAT        |
| 10       | MATE1                   | OCT1, OCT3, PMAT, MATE1 |

**Table S3.** Effects of selected biguanides on the production of intracellular reactive oxygen species in MCF-7 and MDA-MB-231 cells.

| Compound [ $\mu\text{mol/L}$ ]     | Median fluorescence<br>[RFU]               |
|------------------------------------|--------------------------------------------|
| <b>Control MCF-7</b>               | <b>204 422.3 <math>\pm</math> 17 741.1</b> |
| AAPH [100 $\mu\text{mol/L}$ ]      | 328 183.3 $\pm$ 95 164.4*                  |
| Metformin [500 $\mu\text{mol/L}$ ] | 226 427.2 $\pm$ 60 332.4                   |
| Comp. 2 [44 $\mu\text{mol/L}$ ]    | 40 907.4 $\pm$ 10 098.9**                  |
| Comp. 3 [72.5 $\mu\text{mol/L}$ ]  | 391 177.4 $\pm$ 42 746.8*                  |
| Comp. 4 [678.5 $\mu\text{mol/L}$ ] | 179 072.7 $\pm$ 22 957.6                   |
| Comp. 8 [7.8 $\mu\text{mol/L}$ ]   | 418 376.2 $\pm$ 272 653.5                  |
| Comp. 10 [24.2 $\mu\text{mol/L}$ ] | 377 063.6 $\pm$ 18 351.2**                 |
| <b>Control MDA-MB-231</b>          | <b>184 715.4 <math>\pm</math> 23 171.9</b> |
| AAPH [100 $\mu\text{mol/L}$ ]      | 344 061.3 $\pm$ 65 766.2*                  |
| Metformin [500 $\mu\text{mol/L}$ ] | 305 732.8 $\pm$ 36 879.5*                  |
| Comp. 4 [678.5 $\mu\text{mol/L}$ ] | 198 801.63 $\pm$ 25 103.0                  |
| Comp. 8 [452 $\mu\text{mol/L}$ ]   | 252 568.2 $\pm$ 22 955.4                   |
| Comp. 10 [496 $\mu\text{mol/L}$ ]  | 171 794.2 $\pm$ 23 831.0                   |

The experiments were performed using 2',7'-dichlorodihydrofluorescein diacetate (H<sub>2</sub>DCFDA), a fluorescent indicator for ROS in cells. The fluorescence of stained cells was measured by flow cytometry. 2,2'-Azobis(2-amidinopropane) dihydrochloride (AAPH) was used as positive control. Results are presented as median intensity of fluorescence of 10000 events (n = 3). Statistically significant differences between the samples and respective controls are depicted by asterisks ( $p < 0.05$ ; \*\*  $p < 0.01$ ).

**Table S4.** The effects of metformin and its sulfonamide derivatives on MCF-7 cell migration.

| Compound  | Conc.<br>[μmol/L] | T <sub>0</sub><br>[μm] | T <sub>4</sub><br>[μm] | T <sub>24</sub><br>[μm] | T <sub>48</sub><br>[μm] |
|-----------|-------------------|------------------------|------------------------|-------------------------|-------------------------|
| Control   | -                 | 77.05 ± 13.80          | 70.79 ± 10.80          | 56.84 ± 5.13            | 38.70 ± 8.11            |
| Metformin | 500               | 76.90 ± 4.48           | 78.67 ± 3.97           | 72.73 ± 3.89*           | 60.97 ± 3.07***         |
|           | 1000              | 77.77 ± 5.53           | 76.56 ± 3.56           | 73.11 ± 2.28*           | 63.84 ± 7.12***         |
| Comp. 2   | 22                | 83.74 ± 15.63          | 82.52 ± 10.61*         | 83.29 ± 10.98***        | 76.68 ± 15.27***        |
|           | 44                | 83.84 ± 11.67          | 82.46 ± 10.98*         | 81.88 ± 10.47***        | 73.80 ± 12.07***        |
| Comp. 3   | 36.2              | 83.44 ± 9.38           | 80.47 ± 7.09           | 71.36 ± 9.06**          | 64.78 ± 15.91***        |
|           | 72.5              | 72.65 ± 4.38           | 71.03 ± 5.54           | 68.74 ± 9.65*           | 60.94 ± 16.82***        |
| Comp. 4   | 339.25            | 83.99 ± 12.23          | 82.77 ± 9.49*          | 66.12 ± 8.57            | 73.00 ± 12.01***        |
|           | 678.5             | 76.76 ± 14.23          | 75.99 ± 13.63          | 76.62 ± 12.27***        | 71.00 ± 14.41***        |
| Comp. 8   | 3.9               | 79.24 ± 13.03          | 78.09 ± 12.85          | 77.35 ± 15.31***        | 70.08 ± 15.92***        |
|           | 7.8               | 80.79 ± 12.02          | 78.52 ± 11.69          | 70.98 ± 16.39**         | 65.23 ± 16.19***        |
| Comp. 10  | 12.1              | 86.52 ± 9.93           | 80.54 ± 10.81          | 73.10 ± 17.41**         | 69.66 ± 16.38***        |
|           | 24.2              | 73.21 ± 10.13          | 75.42 ± 13.37          | 73.69 ± 18.32***        | 67.71 ± 17.69***        |

Results are presented as mean ± SD of the wound width, n = 8-12 at various time points (T<sub>0</sub>, 4 hours (T<sub>4</sub>), 24 hours (T<sub>24</sub>), and 48 hours (T<sub>48</sub>)). Asterisks represent statistically significant changes versus control (\*  $p < 0.05$ ; \*\*  $p < 0.01$ ; \*\*\*  $p < 0.001$ ).

**Table S5.** The effects of metformin and its sulfonamide derivatives on MDA-MB-231 cell migration.

| Compound  | Conc.<br>[μmol/L] | T <sub>0</sub><br>[μm] | T <sub>4</sub><br>[μm] | T <sub>24</sub><br>[μm] | T <sub>48</sub><br>[μm] |
|-----------|-------------------|------------------------|------------------------|-------------------------|-------------------------|
| Control   | -                 | 84.73 ± 11.95          | 75.38 ± 11.82          | 55.42 ± 10.66           | 35.01 ± 9.28            |
| Metformin | 500               | 83.26 ± 3.90           | 78.51 ± 5.50           | 72.44 ± 5.35***         | 62.87 ± 4.62***         |
|           | 1000              | 80.97 ± 4.53           | 76.91 ± 2.95           | 71.10 ± 2.43***         | 64.74 ± 5.04***         |
| Comp. 4   | 327               | 85.89 ± 5.09           | 80.13 ± 4.79           | 49.57 ± 8.52            | 36.09 ± 9.91            |
|           | 654               | 80.50 ± 7.82           | 74.86 ± 9.03           | 50.14 ± 11.35           | 41.25 ± 14.28           |
| Comp. 8   | 226               | 87.88 ± 9.50           | 82.53 ± 13.39          | 59.55 ± 7.19            | 52.73 ± 11.76***        |
|           | 452               | 80.20 ± 15.48          | 77.14 ± 11.12          | 65.09 ± 9.72**          | 50.01 ± 13.74***        |
| Comp. 10  | 248               | 91.03 ± 11.53          | 89.98 ± 9.28**         | 69.47 ± 7.39***         | 58.85 ± 13.74***        |
|           | 496               | 83.63 ± 12.41          | 87.55 ± 13.48**        | 65.35 ± 10.54**         | 56.99 ± 15.74***        |

Results are presented as mean ± SD of the wound width, n = 8-12 at various time points (T<sub>0</sub>, 4 hours (T<sub>4</sub>), 24 hours (T<sub>24</sub>), and 48 hours (T<sub>48</sub>)). Asterisk represent statistically significant changes versus control (\*  $p < 0.05$ ; \*\*  $p < 0.01$ ; \*\*\*  $p < 0.001$ ).

**Figure S4.** Inhibition of cell migration in the presence of selected biguanides. MCF-7 (A) and MDA-MB-231 (B) cells migration was evaluated using wound healing assay. Representative cell images are shown for control samples and biguanides at the concentrations corresponding to  $1/2 \times IC_{50}$  value. Cells were photographed using an inverted microscope at the indicated times ( $t = 0, 4, 24$  and  $48$  h);  $100\times$  magnification.

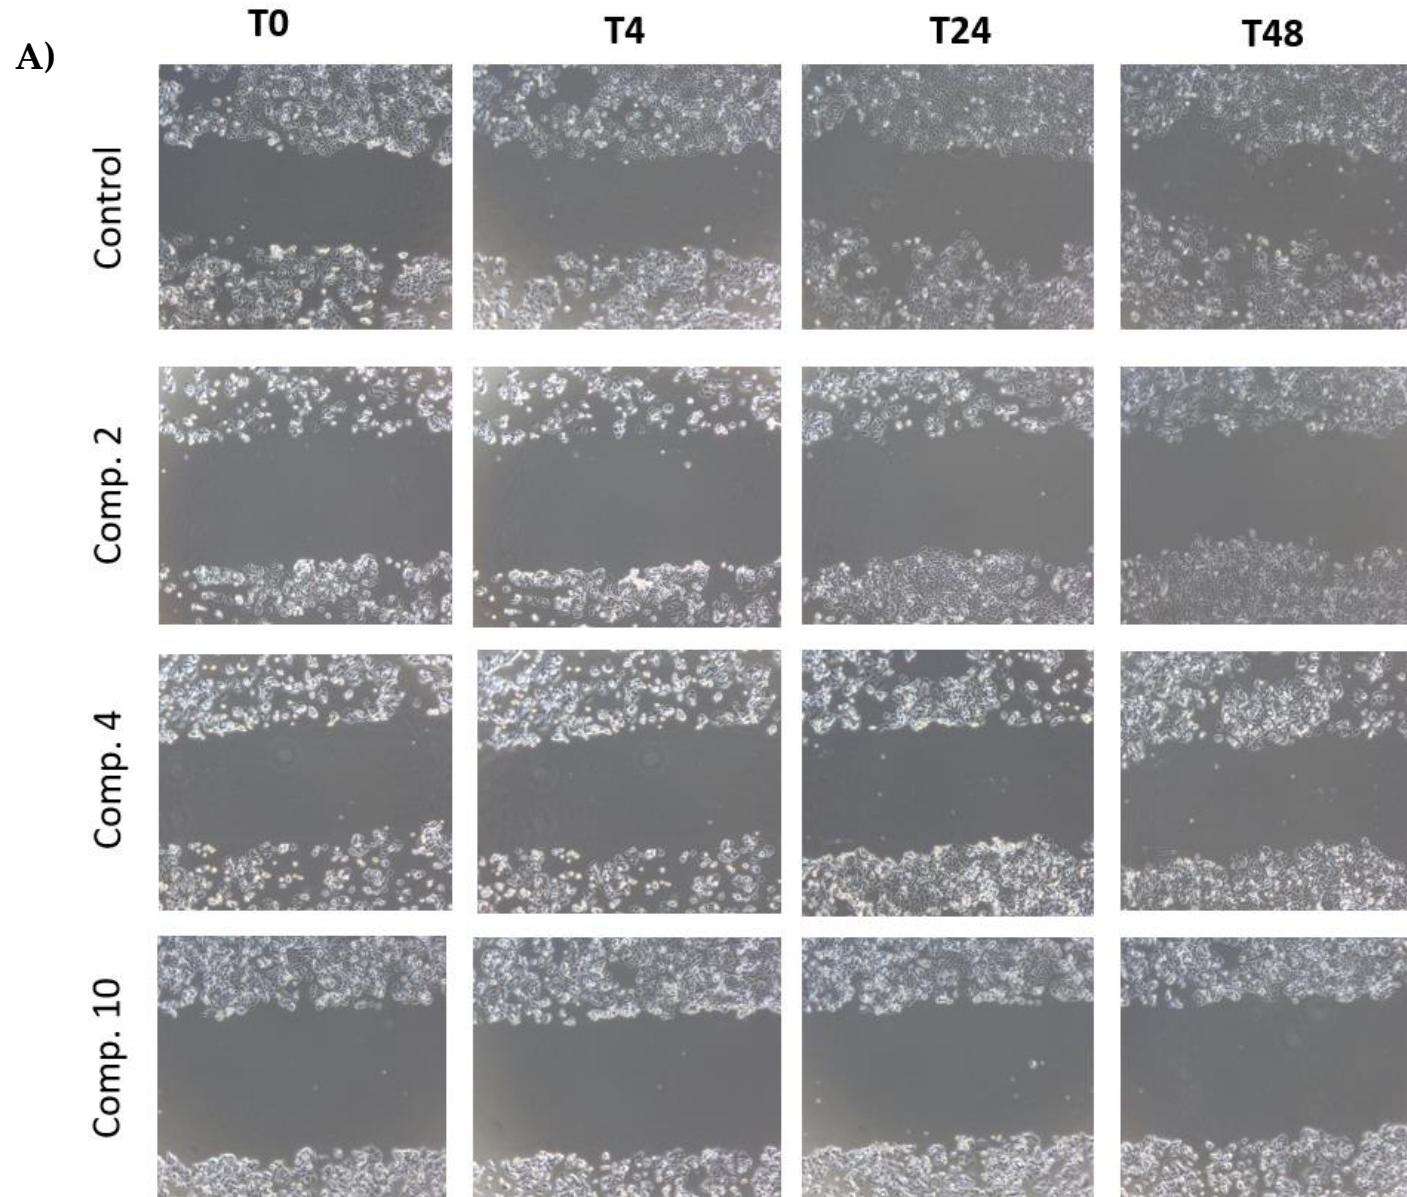

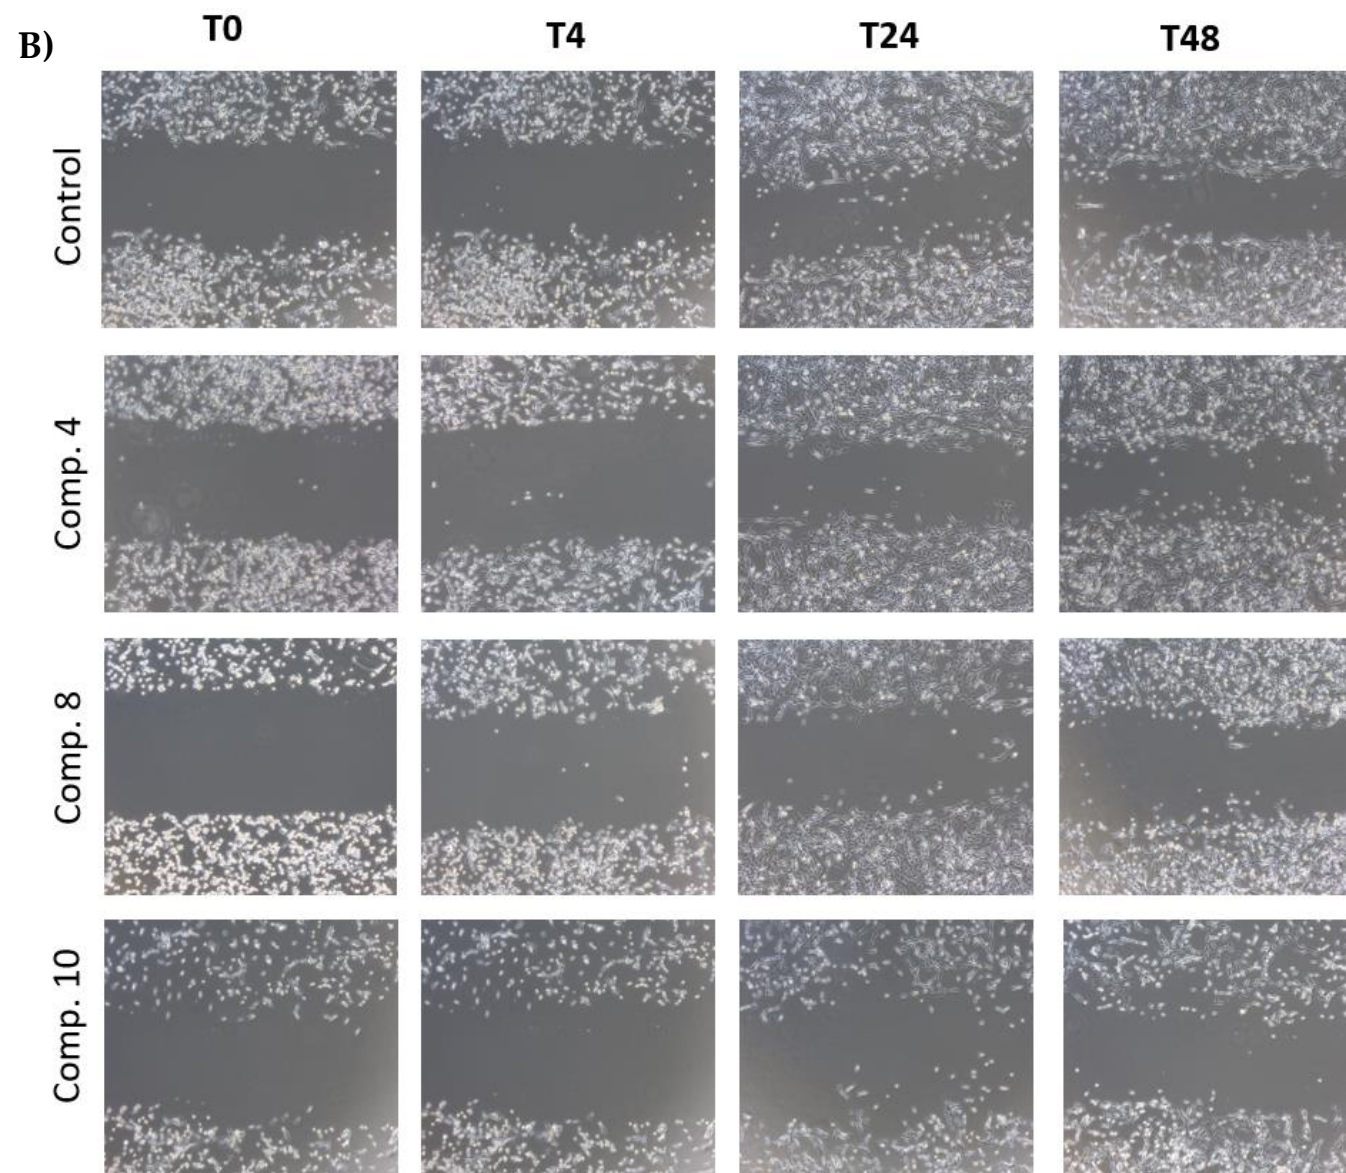

Supplement: s1 [file s1]
